# Supplementary material
Source: PubMed Central journal article supplement (PMC2838496)
Supplement: NIHMS173162-supplement-1_si_001.pdf [file NIHMS173162-supplement-1_si_001.pdf]

## Supporting Information

### References Full Reference #20

Gaussian 03, Revision E.01,  
M. J. Frisch, G. W. Trucks, H. B. Schlegel, G. E. Scuseria,  
M. A. Robb, J. R. Cheeseman, J. A. Montgomery, Jr., T. Vreven,  
K. N. Kudin, J. C. Burant, J. M. Millam, S. S. Iyengar, J. Tomasi,  
V. Barone, B. Mennucci, M. Cossi, G. Scalmani, N. Rega,  
G. A. Petersson, H. Nakatsuji, M. Hada, M. Ehara, K. Toyota,  
R. Fukuda, J. Hasegawa, M. Ishida, T. Nakajima, Y. Honda, O. Kitao,  
H. Nakai, M. Klene, X. Li, J. E. Knox, H. P. Hratchian, J. B. Cross,  
V. Bakken, C. Adamo, J. Jaramillo, R. Gomperts, R. E. Stratmann,  
O. Yazyev, A. J. Austin, R. Cammi, C. Pomelli, J. W. Ochterski,  
P. Y. Ayala, K. Morokuma, G. A. Voth, P. Salvador, J. J. Dannenberg,  
V. G. Zakrzewski, S. Dapprich, A. D. Daniels, M. C. Strain,  
O. Farkas, D. K. Malick, A. D. Rabuck, K. Raghavachari,  
J. B. Foresman, J. V. Ortiz, Q. Cui, A. G. Baboul, S. Clifford,  
J. Cioslowski, B. B. Stefanov, G. Liu, A. Liashenko, P. Piskorz,  
I. Komaromi, R. L. Martin, D. J. Fox, T. Keith, M. A. Al-Laham,  
C. Y. Peng, A. Nanayakkara, M. Challacombe, P. M. W. Gill,  
B. Johnson, W. Chen, M. W. Wong, C. Gonzalez, and J. A. Pople,  
Gaussian, Inc., Wallingford CT, 2004.

### **Figure S1 Alleviation of backbonding with O-O bond elongation**

As the O-O bond is elongated mixing with the C-S  $\pi^*$  orbital is reduced and the  $d_{xy}$  orbital rotates and interacts with the hydroperoxide  $\sigma^*$  orbital.

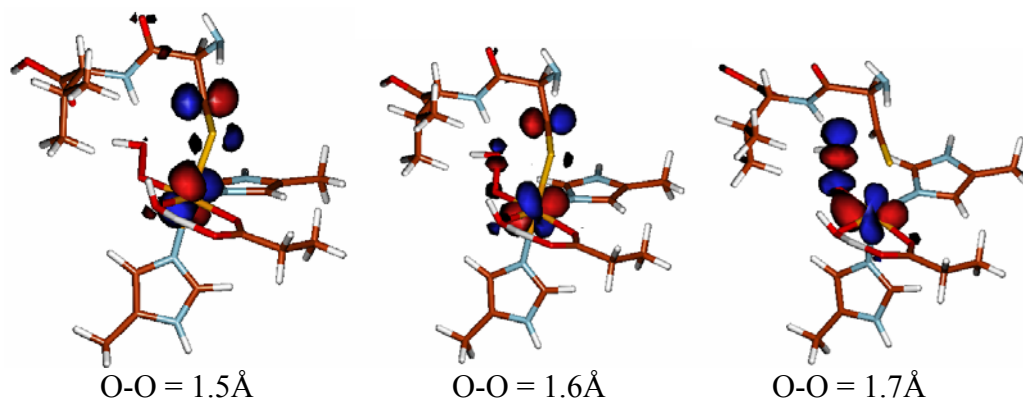

**Table S1 Key Computational Results**

| OO         | Bond Length (Å) |      |      | Spin Density |         |         | S    | C     |
|------------|-----------------|------|------|--------------|---------|---------|------|-------|
|            | Fe-S            | Fe-O | S-C  | Fe           | O(prox) | O(dist) |      |       |
| Model 1    |                 |      |      |              |         |         |      |       |
| 1.46       | 2.50            | 1.94 | 1.65 | 3.84         | 0.15    | 0.02    | 0.05 | -0.26 |
| 1.60       | 2.54            | 1.90 | 1.65 | 3.79         | 0.14    | 0.01    | 0.05 | -0.19 |
| 1.70       | 2.89            | 1.78 | 1.64 | 3.75         | 0.17    | -0.16   | 0.03 | 0.00  |
| 1.90       | 2.83            | 1.72 | 1.64 | 3.79         | 0.26    | -0.35   | 0.05 | -0.01 |
| 2.20       | 2.76            | 1.66 | 1.65 | 3.53         | 0.42    | -0.24   | 0.07 | -0.01 |
| 2.50       | 2.64            | 1.63 | 1.65 | 3.01         | 0.62    | 0.10    | 0.10 | -0.01 |
| Model 2    |                 |      |      |              |         |         |      |       |
| 1.42       | 2.44            | 1.89 | 1.67 | 3.82         | 0.19    | 0.02    | 0.00 | -0.25 |
| 1.60       | 2.54            | 1.92 | 1.64 | 3.70         | 0.11    | 0.03    | 0.03 | -0.03 |
| 1.75       | 2.53            | 1.73 | 1.82 | 3.79         | 0.01    | -0.15   | 0.16 | 0.00  |
| 1.90       | 2.37            | 1.66 | 1.86 | 3.04         | 0.62    | 0.10    | 0.11 | -0.01 |
| 2.05       | 2.32            | 1.65 | 1.88 | 3.04         | 0.61    | 0.07    | 0.13 | -0.01 |
| Model 3    |                 |      |      |              |         |         |      |       |
| 1.42       | 2.44            | 1.89 | 1.67 | 3.82         | 0.19    | 0.02    | 0.00 | -0.25 |
| 1.60       | 2.50            | 1.91 | 1.64 | 3.72         | 0.12    | 0.03    | 0.03 | -0.08 |
| 1.75       | 2.68            | 1.76 | 1.63 | 3.73         | 0.21    | -0.22   | 0.01 | 0.07  |
| 1.90       | 2.70            | 1.72 | 1.63 | 3.79         | 0.31    | -0.39   | 0.02 | 0.06  |
| 2.05       | 2.71            | 1.69 | 1.64 | 3.78         | 0.37    | -0.48   | 0.03 | 0.06  |
| Free(2.20) | 2.78            | 1.68 | 1.64 | 3.67         | 0.45    | -0.48   | 0.01 | 0.09  |

**Table S2 Spin Densities from Elongation of the O-O bond with the dipole present**

| O-O (Å) | Spin Density |          |          |
|---------|--------------|----------|----------|
|         | Fe           | O (prox) | O (dist) |
| 1.75    | 3.76         | 0.16     | 0.00     |
| 1.90    | 3.77         | 0.24     | -0.31    |
| 2.05    | 3.73         | 0.32     | -0.39    |
| 2.20    | 3.59         | 0.40     | 0.00     |

**Table S3 Cartesian Coordinates of Optimized IPNS-ACV-Fe<sup>II</sup>-Peroxide (Model 1)**

| Atom | X         | Y         | Z         |
|------|-----------|-----------|-----------|
| C    | 2.394007  | -2.264633 | 1.330973  |
| N    | 1.605436  | -1.133044 | 1.445520  |
| C    | 1.188543  | -1.093504 | 2.704090  |
| N    | 1.680047  | -2.159461 | 3.395994  |
| C    | 2.456378  | -2.927673 | 2.535435  |
| Fe   | 1.025291  | 0.177297  | -0.158453 |
| O    | 2.607274  | -0.581714 | -1.263451 |
| C    | 3.035883  | -0.297749 | -2.444075 |
| C    | 4.244234  | -1.093783 | -2.945894 |
| C    | 4.701368  | -2.216254 | -2.017796 |
| C    | 3.134931  | -4.191713 | 2.950798  |
| N    | 2.403460  | 1.762493  | 0.373586  |
| C    | 3.724547  | 1.682557  | 0.391177  |
| N    | 4.270423  | 2.909490  | 0.614839  |
| C    | 3.238880  | 3.831809  | 0.742489  |
| C    | 2.089043  | 3.088434  | 0.592655  |
| C    | 3.479314  | 5.287521  | 0.960925  |
| S    | -0.320710 | -1.603954 | -1.265666 |
| C    | -1.368124 | -2.155431 | -0.110721 |
| C    | -2.714716 | -2.740130 | -0.402081 |
| N    | -2.730507 | -3.597239 | -1.583714 |
| O    | -0.444280 | 1.031647  | 0.770263  |
| O    | -1.258529 | 0.260804  | 1.710500  |
| O    | 0.573119  | 1.494784  | -1.845448 |
| C    | -3.837009 | -1.633115 | -0.500893 |
| O    | -4.888494 | -1.908636 | -1.085056 |
| N    | -3.588031 | -0.434687 | 0.090782  |
| C    | -4.584107 | 0.622350  | 0.062677  |
| C    | -4.697617 | 1.274777  | 1.430095  |
| O    | -3.826692 | 1.335011  | 2.288145  |
| C    | -4.325131 | 1.728675  | -1.018127 |
| C    | -4.184382 | 1.087981  | -2.405230 |
| C    | -3.119723 | 2.620508  | -0.686030 |
| O    | 2.560975  | 0.577264  | -3.213042 |
| O    | -5.901449 | 1.866712  | 1.596769  |
| H    | -5.862307 | 2.314570  | 2.469937  |
| H    | -5.543126 | 0.140491  | -0.180256 |
| H    | -5.237389 | 2.352244  | -1.014860 |
| H    | -4.139723 | 1.871845  | -3.177813 |
| H    | -3.257186 | 0.496624  | -2.470521 |
| H    | -5.024802 | 0.416249  | -2.633663 |
| H    | -2.941078 | 3.331000  | -1.508979 |
| H    | -3.285778 | 3.215405  | 0.226830  |
| H    | -2.195537 | 2.037359  | -0.532763 |
| H    | -2.687210 | -0.271183 | 0.568344  |
| H    | -3.708463 | -3.627036 | -1.898399 |
| H    | -2.209593 | -3.117592 | -2.327220 |
| H    | -1.113421 | -2.007441 | 0.942820  |
| H    | -1.913845 | 0.930264  | 2.008939  |
| H    | 3.686940  | -4.610267 | 2.098226  |
| H    | 3.857160  | -4.030207 | 3.769163  |
| H    | 2.414757  | -4.956977 | 3.286584  |

|   |           |           |           |
|---|-----------|-----------|-----------|
| H | 1.489301  | -2.369080 | 4.370307  |
| H | 0.501379  | -0.355869 | 3.106095  |
| H | 2.855787  | -2.515717 | 0.381607  |
| H | 5.580079  | -2.737624 | -2.431350 |
| H | 4.970736  | -1.828325 | -1.023975 |
| H | 3.901636  | -2.958949 | -1.877321 |
| H | 3.983390  | -1.483929 | -3.943438 |
| H | 5.058288  | -0.368989 | -3.123264 |
| H | -0.243724 | 1.241439  | -2.310163 |
| H | 1.339651  | 1.239752  | -2.480808 |
| H | 2.517693  | 5.814783  | 1.027035  |
| H | 4.031834  | 5.486449  | 1.895253  |
| H | 4.048861  | 5.741977  | 0.132441  |
| H | 5.262135  | 3.119785  | 0.655528  |
| H | 4.299538  | 0.777960  | 0.224639  |
| H | 1.052796  | 3.409649  | 0.616438  |
| H | -3.014081 | -3.348712 | 0.473758  |

**Table S4 Cartesian Coordinates of Optimized IPNS-ACOV-Fe<sup>II</sup>-Peroxide (Models 2 & 3)**

| Atom | X         | Y         | Z         |
|------|-----------|-----------|-----------|
| C    | -2.150520 | -2.714020 | -0.476916 |
| N    | -1.358521 | -1.651373 | -0.861528 |
| C    | -1.237284 | -1.727642 | -2.177515 |
| N    | -1.922399 | -2.804003 | -2.652288 |
| C    | -2.516986 | -3.453331 | -1.577012 |
| Fe   | -0.453657 | -0.180903 | 0.418424  |
| O    | -0.935272 | -1.662339 | 1.965554  |
| C    | -3.341814 | -4.685890 | -1.714623 |
| N    | 0.139727  | 1.145638  | -1.191211 |
| C    | 1.358532  | 1.262194  | -1.836339 |
| C    | 1.337199  | 2.333917  | -2.701194 |
| N    | 0.060381  | 2.867361  | -2.562764 |
| C    | -0.627622 | 2.128329  | -1.650081 |
| C    | 2.367730  | 2.911816  | -3.614638 |
| O    | 1.342447  | -1.121786 | 0.130370  |
| C    | 1.931596  | -2.012084 | 0.847296  |
| O    | 1.427342  | -2.629441 | 1.823496  |
| S    | 0.529331  | 1.022150  | 2.296991  |
| C    | 0.145728  | 2.637856  | 2.082932  |
| C    | -0.162744 | 3.550324  | 3.241273  |
| O    | -2.091320 | 0.747161  | 0.609554  |
| O    | -2.297944 | 2.137959  | 0.804492  |
| C    | 3.373691  | -2.364083 | 0.473571  |
| C    | 4.037171  | -1.403496 | -0.510745 |
| N    | 1.090692  | 4.237120  | 3.591698  |
| H    | 0.915490  | 4.912753  | 4.342586  |
| H    | 1.742642  | 3.542569  | 3.968440  |
| H    | 0.467551  | 3.134979  | 1.158387  |
| H    | -1.524660 | 2.408468  | 1.398952  |
| H    | 3.292412  | 2.322396  | -3.548375 |
| H    | 2.043135  | 2.905531  | -4.669221 |
| H    | 2.618882  | 3.952606  | -3.348938 |
| H    | -0.294720 | 3.688501  | -3.042080 |

|   |           |           |           |
|---|-----------|-----------|-----------|
| H | -1.627194 | 2.352423  | -1.284620 |
| H | 2.162868  | 0.568832  | -1.613330 |
| H | 5.082037  | -1.695685 | -0.704563 |
| H | 3.502111  | -1.395922 | -1.472257 |
| H | 4.036887  | -0.375710 | -0.117348 |
| H | 3.941441  | -2.427119 | 1.415743  |
| H | 3.361981  | -3.391907 | 0.069416  |
| H | -1.060949 | -1.222754 | 2.825995  |
| H | -0.021753 | -2.146635 | 2.017249  |
| H | -3.694080 | -5.003132 | -0.723686 |
| H | -4.231829 | -4.526467 | -2.347177 |
| H | -2.770240 | -5.524720 | -2.147307 |
| H | -1.986181 | -3.085221 | -3.625079 |
| H | -0.670822 | -1.044522 | -2.802089 |
| H | -2.377421 | -2.871467 | 0.572078  |
| H | -0.888424 | 4.328232  | 2.940068  |
| H | -0.623231 | 2.960185  | 4.058835  |

**Table S5 Cartesian Coordinates from the Transition State of IPNS-ACV-Peroxide O-O Bond Cleavage (Model 1)**

| Atom | X         | Y         | Z         |
|------|-----------|-----------|-----------|
| C    | 2.438642  | -2.211706 | 1.413955  |
| N    | 1.610804  | -1.104783 | 1.470836  |
| C    | 1.083642  | -1.090551 | 2.688499  |
| N    | 1.543948  | -2.150558 | 3.409626  |
| C    | 2.414947  | -2.886615 | 2.613240  |
| Fe   | 1.087480  | 0.218682  | -0.131081 |
| O    | 2.666048  | -0.580781 | -1.236210 |
| C    | 2.990600  | -0.473027 | -2.476023 |
| C    | 4.206605  | -1.279723 | -2.940368 |
| C    | 4.730663  | -2.283733 | -1.916657 |
| C    | 3.090840  | -4.135883 | 3.075699  |
| N    | 2.475092  | 1.790608  | 0.376898  |
| C    | 3.792791  | 1.697964  | 0.286570  |
| N    | 4.366317  | 2.916141  | 0.479636  |
| C    | 3.357897  | 3.846669  | 0.701293  |
| C    | 2.192067  | 3.116315  | 0.636286  |
| C    | 3.634225  | 5.296323  | 0.914142  |
| S    | -0.337483 | -1.575163 | -1.237173 |
| C    | -1.393514 | -2.089860 | -0.083799 |
| C    | -2.718372 | -2.717763 | -0.367813 |
| N    | -2.718116 | -3.587416 | -1.536650 |
| O    | -0.314790 | 1.112244  | 0.794807  |
| O    | -1.357578 | 0.311973  | 1.707034  |
| O    | 0.646137  | 1.434045  | -1.887229 |
| C    | -3.855360 | -1.618941 | -0.482834 |
| O    | -4.893131 | -1.917776 | -1.078962 |
| N    | -3.629142 | -0.413301 | 0.100503  |
| C    | -4.631729 | 0.636716  | 0.026595  |
| C    | -4.799267 | 1.304193  | 1.382414  |
| O    | -3.954967 | 1.396128  | 2.261649  |
| C    | -4.330828 | 1.731131  | -1.054677 |
| C    | -4.161682 | 1.079489  | -2.433692 |
| C    | -3.122657 | 2.609480  | -0.696885 |
| O    | 2.410854  | 0.244545  | -3.333193 |

|   |           |           |           |
|---|-----------|-----------|-----------|
| O | -6.022982 | 1.869972  | 1.503160  |
| H | -6.020281 | 2.330227  | 2.370676  |
| H | -5.579197 | 0.149454  | -0.246816 |
| H | -5.233861 | 2.367442  | -1.080265 |
| H | -4.088724 | 1.856693  | -3.210822 |
| H | -3.240014 | 0.477102  | -2.472331 |
| H | -5.003796 | 0.415806  | -2.679149 |
| H | -2.918667 | 3.318092  | -1.515599 |
| H | -3.299941 | 3.205495  | 0.212758  |
| H | -2.207431 | 2.017251  | -0.525693 |
| H | -2.735146 | -0.217623 | 0.589167  |
| H | -3.694321 | -3.637784 | -1.853565 |
| H | -2.201614 | -3.112137 | -2.285929 |
| H | -1.172751 | -1.871550 | 0.965753  |
| H | -1.915103 | 1.066525  | 1.990028  |
| H | 3.718582  | -4.535831 | 2.267747  |
| H | 3.742249  | -3.961098 | 3.948967  |
| H | 2.366020  | -4.920579 | 3.351179  |
| H | 1.276970  | -2.375840 | 4.362332  |
| H | 0.340556  | -0.374648 | 3.028943  |
| H | 2.986364  | -2.439869 | 0.505423  |
| H | 5.614365  | -2.817944 | -2.302462 |
| H | 5.015509  | -1.785457 | -0.978140 |
| H | 3.962642  | -3.033911 | -1.673969 |
| H | 3.928679  | -1.777294 | -3.883501 |
| H | 4.991392  | -0.552704 | -3.215651 |
| H | -0.248771 | 1.284579  | -2.239445 |
| H | 1.297298  | 1.039778  | -2.579635 |
| H | 2.688881  | 5.835320  | 1.065537  |
| H | 4.265073  | 5.477341  | 1.801293  |
| H | 4.139317  | 5.752971  | 0.045991  |
| H | 5.360266  | 3.116591  | 0.443191  |
| H | 4.339696  | 0.789692  | 0.058258  |
| H | 1.164597  | 3.446192  | 0.750911  |
| H | -3.009704 | -3.315913 | 0.517643  |

**Table S6 Cartesian Coordinates of Optimized IPNS-ACV- $\beta$  Lactam Fe<sup>IV</sup>-oxo (Model 1)**

| Atom | X        | Y         | Z         |
|------|----------|-----------|-----------|
| C    | 2.158068 | 2.733272  | 0.831306  |
| N    | 2.390237 | 1.435938  | 0.418168  |
| C    | 3.702131 | 1.304893  | 0.296733  |
| N    | 4.320096 | 2.472457  | 0.621195  |
| C    | 3.349593 | 3.410532  | 0.961338  |
| Fe   | 0.808783 | 0.152976  | -0.221781 |
| O    | 0.759280 | 1.680152  | -1.788855 |
| C    | 3.670091 | 4.825097  | 1.331263  |
| N    | 1.144589 | -1.356994 | 1.290177  |
| C    | 1.916935 | -2.502097 | 1.253112  |
| C    | 1.633291 | -3.302664 | 2.337453  |
| N    | 0.660292 | -2.599845 | 3.040153  |
| C    | 0.391301 | -1.440676 | 2.381073  |
| C    | 2.151715 | -4.638712 | 2.768253  |
| O    | 2.202805 | -0.841584 | -1.267677 |
| C    | 2.715415 | -0.626563 | -2.438308 |
| O    | 2.475674 | 0.354432  | -3.180186 |

|   |           |           |           |
|---|-----------|-----------|-----------|
| S | -0.877654 | -0.953793 | -1.377404 |
| C | -2.280024 | -1.186963 | -0.241430 |
| C | -3.366016 | -2.238635 | -0.703421 |
| C | -4.390283 | -1.111184 | -0.448760 |
| N | -3.400421 | -0.193251 | -0.156297 |
| C | -3.635901 | 1.050280  | 0.567581  |
| C | -3.667165 | 2.326722  | -0.312514 |
| C | -2.379586 | 2.548771  | -1.109752 |
| O | -0.245755 | 0.921877  | 0.763342  |
| C | 3.691728  | -1.680837 | -2.972278 |
| C | 4.327440  | -2.623610 | -1.948600 |
| N | -3.240991 | -2.827618 | -2.023116 |
| O | -5.606611 | -1.001567 | -0.437865 |
| C | -2.776983 | 1.103216  | 1.831385  |
| O | -2.445560 | 2.363048  | 2.192417  |
| O | -2.504206 | 0.131881  | 2.520616  |
| C | -4.887585 | 2.292079  | -1.246102 |
| H | -1.902806 | 2.258624  | 3.002701  |
| H | -4.667337 | 0.928894  | 0.960808  |
| H | -3.795939 | 3.168387  | 0.389264  |
| H | -4.948098 | 3.226233  | -1.827138 |
| H | -4.817294 | 1.455017  | -1.958173 |
| H | -5.829838 | 2.170933  | -0.688851 |
| H | -2.429807 | 3.503459  | -1.658014 |
| H | -1.493452 | 2.553115  | -0.460420 |
| H | -2.260355 | 1.735505  | -1.846160 |
| H | -4.120291 | -3.299858 | -2.252895 |
| H | -3.110604 | -2.087852 | -2.719347 |
| H | -1.886776 | -1.402356 | 0.758892  |
| H | 2.906920  | -4.989780 | 2.051915  |
| H | 2.626544  | -4.600842 | 3.763316  |
| H | 1.352413  | -5.397730 | 2.806395  |
| H | 0.196144  | -2.911451 | 3.887307  |
| H | -0.363292 | -0.717460 | 2.681678  |
| H | 2.605828  | -2.673050 | 0.433820  |
| H | 5.043839  | -3.300696 | -2.439967 |
| H | 4.872597  | -2.070576 | -1.166805 |
| H | 3.563867  | -3.241594 | -1.454902 |
| H | 3.127149  | -2.266326 | -3.719335 |
| H | 4.458711  | -1.136346 | -3.545186 |
| H | -0.119420 | 1.573300  | -2.201063 |
| H | 1.426163  | 1.278251  | -2.451266 |
| H | 2.740068  | 5.366207  | 1.552012  |
| H | 4.314036  | 4.888171  | 2.224655  |
| H | 4.178318  | 5.358915  | 0.510939  |
| H | 5.321518  | 2.635681  | 0.598615  |
| H | 4.217058  | 0.406141  | -0.024216 |
| H | 1.142625  | 3.082526  | 0.983935  |
| H | -3.481011 | -3.048375 | 0.035963  |

**Table S7 Cartesian Coordinates of Optimized IPNS-Thiocarboxylate Fe<sup>II</sup> (Model 2)**

| Atom | X        | Y         | Z         |
|------|----------|-----------|-----------|
| C    | 2.871525 | 1.194494  | -0.940189 |
| N    | 2.323899 | -0.000448 | -0.783955 |
| C    | 3.370577 | -0.905435 | -0.787215 |

|    |           |           |           |
|----|-----------|-----------|-----------|
| C  | 4.573502  | -0.251983 | -0.945968 |
| N  | 4.226032  | 1.090789  | -1.042910 |
| Fe | 0.224534  | -0.399929 | -0.346320 |
| O  | 0.565833  | -0.353316 | 1.636583  |
| C  | 1.013474  | -1.292335 | 2.397663  |
| O  | 1.407235  | -2.424244 | 2.012172  |
| C  | 5.987596  | -0.735806 | -1.009894 |
| N  | -0.430895 | 1.646926  | -0.307872 |
| C  | -1.101451 | 2.308653  | -1.243065 |
| N  | -1.652639 | 3.441068  | -0.721149 |
| C  | -1.324902 | 3.511900  | 0.626554  |
| C  | -0.561135 | 2.389069  | 0.854192  |
| C  | -1.787065 | 4.608984  | 1.529788  |
| O  | -0.162661 | -0.417730 | -2.440683 |
| O  | 0.710407  | -2.511787 | -0.472268 |
| C  | 1.078169  | -0.970525 | 3.891006  |
| C  | -0.088777 | -0.108463 | 4.384348  |
| S  | -2.293254 | -1.229637 | 0.007107  |
| C  | -3.197160 | -0.908293 | -1.433414 |
| C  | -4.736874 | -1.037429 | -1.379233 |
| N  | -5.395400 | -1.412551 | -0.137750 |
| O  | -2.722205 | -0.568836 | -2.543514 |
| H  | -5.021917 | -2.318388 | 0.163814  |
| H  | -5.087905 | -0.765865 | 0.596203  |
| H  | -1.175488 | -0.521320 | -2.583798 |
| H  | -1.400870 | 4.437320  | 2.543784  |
| H  | -1.433260 | 5.601078  | 1.201053  |
| H  | -2.887173 | 4.651654  | 1.597565  |
| H  | -2.236718 | 4.099200  | -1.226540 |
| H  | -1.229228 | 1.988825  | -2.272162 |
| H  | -0.117981 | 2.033148  | 1.778527  |
| H  | -0.006761 | 0.080491  | 5.466776  |
| H  | -0.108051 | 0.859390  | 3.864840  |
| H  | -1.054001 | -0.602987 | 4.196686  |
| H  | 1.135146  | -1.923720 | 4.436830  |
| H  | 2.033836  | -0.445558 | 4.073358  |
| H  | -0.147375 | -2.980482 | -0.471959 |
| H  | 1.048764  | -2.601201 | 0.497998  |
| H  | 6.007114  | -1.829330 | -0.907561 |
| H  | 6.471500  | -0.481371 | -1.968005 |
| H  | 6.606040  | -0.315720 | -0.198883 |
| H  | 4.873812  | 1.862982  | -1.161682 |
| H  | 2.330454  | 2.134899  | -0.976503 |
| H  | 3.184392  | -1.968703 | -0.672631 |
| H  | -5.132276 | -0.064422 | -1.720874 |
| H  | -5.010126 | -1.758905 | -2.168575 |
| H  | 0.301263  | -1.118306 | -2.925607 |
